1 Evaluation of the Access Bio CareStart™ rapid SARS-CoV-2 antigen test in asymptomatic  
2 individuals tested at a community mass-testing program in Western Massachusetts

3

4 **Authors:**

5 Sara Suliman<sup>1\*#</sup>, Wilfredo R. Matias<sup>2\*</sup>, Isabel R Fulcher<sup>3,4</sup>, Francisco J. Molano<sup>5,6</sup>, Shannon  
6 Collins<sup>5</sup>, Elizabeth Uceta<sup>5</sup>, Jack Zhu<sup>5</sup>, Ryan M. Paxton<sup>7</sup>, Sean F. Gonsalves<sup>7</sup>, Maegan V. Harden<sup>8</sup>,  
7 Marissa Fisher<sup>8</sup>, Jim Meldrim<sup>8</sup>, Stacey Gabriel<sup>8</sup>, Molly F. Franke<sup>3</sup>, Deborah T. Hung<sup>8</sup>, Sandra C.  
8 Smole<sup>9</sup>, Lawrence C. Madoff<sup>9</sup>, Louise C. Ivers<sup>3,5</sup>

9

10 <sup>1</sup>Division of Rheumatology, Inflammation and Immunity, Brigham and Women’s Hospital, Harvard  
11 Medical School, Boston, MA, USA

12 <sup>2</sup>Department of Medicine, Brigham and Women's Hospital, Boston, MA, USA

13 <sup>3</sup>Department of Global Health and Social Medicine, Harvard Medical School, 641 Huntington  
14 Avenue, Boston, MA 02115, USA

15 <sup>4</sup>Harvard Data Science Initiative, Cambridge, MA, USA

16 <sup>5</sup>Center for Global Health, Massachusetts General Hospital, Boston, MA, USA

17 <sup>6</sup>Faculty of Medicine, University of Antioquia, Medellín, Antioquia, Colombia

18 <sup>7</sup>Board of Health, City of Holyoke, Holyoke, MA, USA

19 <sup>8</sup>Broad Institute of MIT and Harvard, 415 Main St. Cambridge, MA

20 <sup>9</sup>Massachusetts Department of Public Health, Jamaica Plain, MA, USA

21

22 \*Contributed equally

23

24

25

26 **#Corresponding Author:** Sara Suliman, MPH, PhD., Division of Rheumatology, Inflammation  
27 and Immunity, Brigham and Women's Hospital, Boston MA Email: [ssuliman1@bwh.harvard.edu](mailto:ssuliman1@bwh.harvard.edu)

28 **Running title:** Performance of CareStart™ SARS-CoV-2 rapid antigen test

29

30 **Word Count:** 3,383

31 **Key words:** COVID-19; Rapid antigen test; SARS-CoV-2; CareStart™; asymptomatic

32 **Abstract (200 words)**

33 **Background:** Point-of-care antigen-detecting rapid diagnostic tests (RDTs) for Severe Acute  
34 Respiratory Syndrome Coronavirus 2 (SARS-CoV-2) represent a scalable tool for SARS-CoV-2  
35 infections surveillance. Data on their performance in real-world community settings is paramount  
36 for their implementation.

37 **Method:** We evaluated the accuracy of CareStart™ COVID-19 Antigen test (CareStart) in a  
38 testing site in Holyoke, Massachusetts. We compared CareStart to a SARS-CoV-2 reverse  
39 transcriptase quantitative polymerase chain reaction (RT-qPCR) reference, using anterior nasal  
40 swab samples. We calculated the sensitivity, specificity, and expected positive and negative  
41 predictive values at different SARS-CoV-2 prevalence estimates.

42 **Results:** We performed 666 tests on 591 unique individuals. 573 (86%) were asymptomatic.  
43 There were 52 positive tests by RT-qPCR. The sensitivity of CareStart was 49.0% (95%  
44 Confidence Interval (CI): 34.8 – 63.4) and specificity was 99.5% (95% CI: 98.5 – 99.9). Among  
45 positive RT-qPCR tests, the median cycle threshold (Ct) was significantly lower in samples that  
46 tested positive on CareStart. Using a  $Ct \leq 30$  as a benchmark for positivity increased the sensitivity  
47 to 64.9% (95% CI: 47.5 – 79.8).

48 **Conclusions:** CareStart has a high specificity and moderate sensitivity. The utility of RDTs, such  
49 as CareStart, in mass implementation should prioritize use cases in which a higher specificity is  
50 more important.

51

52 **Introduction**

53           The Coronavirus disease 2019 (COVID-19) pandemic caused by the Severe Acute  
54 Respiratory Syndrome Coronavirus 2 (SARS-CoV-2) is the most significant infectious disease  
55 pandemic in the last century (1, 2). In addition to preventive measures such as social distancing,  
56 mask wearing, and vaccination, pillars of pandemic control rely on tools to rapidly identify cases  
57 and monitor transmission (3). Molecular testing methods based on reverse transcription  
58 quantitative polymerase chain reactions (RT-qPCR) remain the backbone of many testing  
59 programs globally (4). However, RT-qPCR-based testing is heavily influenced by supply chain  
60 restrictions, need for trained personnel and central laboratories, and relatively long turnaround  
61 times, particularly in resource-constrained settings (5). Therefore, it is still challenging to scale up  
62 RT-qPCR tests for population surveillance and the timely detection of the large proportion of  
63 asymptomatic SARS-CoV-2-infected carriers (6). Rapid detection of SARS-CoV-2 infected  
64 individuals allows for faster clinical intervention and implementation of public health measures  
65 such as isolation and contact-tracing, to prevent forward transmission (7).

66           Rapid antigen-detecting diagnostic tests (RDTs) for COVID-19, many of which can yield  
67 actionable results in turnaround times often below 20 minutes, require little laboratory capacity,  
68 and can be performed easily by non-laboratory personnel (8). Furthermore, decentralized access  
69 to RT-qPCR testing remains sparse in resource-constrained communities (9). The low cost of  
70 antigen-detecting RDTs, short turnaround times and ease of use make them excellent candidates  
71 to increase their accessibility for large-scale implementation in varied community settings (10).

72           Since the pandemic's onset, several antigen-detecting RDTs have been developed for the  
73 detection of SARS-CoV-2 (11). Many of the antigen-detecting RDTs received Emergency Use  
74 Authorization (EUA) approvals by the Food and Drug Administration (FDA) (12). However,  
75 evaluations to receive EUA were performed by demonstrating accuracy in symptomatic  
76 individuals only (13). This narrow indication for antigen-detecting RDTs raises their limited utility

77 in detecting SARS-CoV-2 infection in asymptomatic carriers. In fact, several independent  
78 evaluations demonstrate the decreased sensitivity of antigen-detecting RDTs in asymptomatic  
79 RT-qPCR positive individuals compared to those with symptoms (14-17). In the United States,  
80 studies thus far have focused on 3 RDTs: Quidel Sofia™ (8, 18), BD Veritor™ (13, 19) and Abbott  
81 BinaxNOW™ (15, 16, 20). On March 31<sup>st</sup>, 2021, the FDA also authorized these tests for home  
82 use, raising concerns about misinterpretation of false negative results (21). Therefore, evidence  
83 to establish their performance characteristics to guide their implementation in real-world settings  
84 is even more urgent now.

85 In this study, we evaluated the Access Bio CareStart™ COVID-19 RDT (CareStart), a  
86 chromatographic antigen-detecting lateral flow immunoassay that received EUA by the FDA (12,  
87 17). We evaluated CareStart in asymptomatic and mildly symptomatic individuals presenting for  
88 routine testing at one of the ‘Stop the Spread’ free community testing sites in Holyoke,  
89 Massachusetts. Public health messaging for testing at these community testing sites targeted  
90 asymptomatic individuals. We evaluate the sensitivity, specificity, and positive (PPV) and negative  
91 predictive values (NPV) as a function of different prevalence scenarios.

92

93

## 94 **Methods**

### 95 *Study Population and Ethical Approval*

96 This was a prospective evaluation using convenience sampling of asymptomatic and mildly  
97 symptomatic individuals presenting for routine testing for COVID-19. The study was performed  
98 between January 6 and February 26, 2021, at the Holyoke “Stop the Spread” walk-up testing site,  
99 a free Massachusetts public testing program, which targets asymptomatic individuals  
100 (<https://www.transformativehc.com/stopthespread.html>). The testing site was open three days a  
101 week. Individuals who presented to the site during testing hours were approached by our research

102 staff who explained the nature of the study, risks, benefits, and answered any questions before  
103 inviting individuals to participate in the study. Verbal consent was obtained from participants to  
104 collect a second anterior nasal swab as well as from guardians of minors below 18 years of age,  
105 from whom verbal assent was also obtained. The participants were treated in accordance with  
106 Good Clinical Practice guidelines and the Declaration of Helsinki. The study protocol was  
107 approved by the Partners Institutional Review Board (Protocol ID: 2020P003892).

108

#### 109 *Study intake and data collection*

110 After enrollment in the study, our study staff implemented an intake questionnaire capturing  
111 information on participant demographics, presence or absence of symptoms based on case  
112 definitions from the Council for State and Territorial Epidemiologists (22): cough, sore throat,  
113 chills, shortness of breath, fever, muscle aches or soreness, nausea, vomiting or diarrhea,  
114 decreased sense of smell or taste, loss of appetite, general weakness or fatigue, or headaches.  
115 The survey also captured prior COVID-19 testing and potential exposures. Each test was  
116 assigned a unique anonymous ID. Data collected was inputted into a secure Research Electronic  
117 Data Capture (REDCap) database on encrypted tablets. We used the demographic information  
118 and specimen numbers to match the RDTs result with the RT-qPCR data collected at the Broad  
119 Institute Clinical Research Sequencing Platform (CRSP) as performed in other studies (15, 23).

120

#### 121 *Swab collection procedure*

122 The sample was collected by trained personnel at the city testing site. We used dry anterior nasal  
123 (AN) swabs: Puritan 6" Sterile Standard Foam Swab with Polystyrene Handle (Puritan, Guilford).  
124 Both anterior nares were swabbed 2 times (5 rotations in each nostril), once for RT-qPCR testing  
125 and once for the RDT sample. For practical reasons, the swabs for RT-qPCR and RDT were not  
126 always collected in the same order. Both samples were placed inside closed test tubes. The RT-

127 qPCR sample was transported to the Broad Institute at the Massachusetts Institute of Technology.  
128 The second anterior nasal swab sample was transported to a nearby testing station and the RDT  
129 was performed within an hour of sample collection. The RT-qPCR testing results were interpreted  
130 according to the publicly available rubric for the Broad Institute COVID-19 testing program:  
131 <https://sites.broadinstitute.org/safe-for-school/result-code-information>.

132

### 133 *Rapid test procedure*

134 The CareStart device came with instructions for use and diagrams. The study staff received a  
135 one-hour training prior to the study and practiced the RDT on positive and negative control  
136 samples provided in the kit. One operator performed the test at a workstation following the  
137 CareStart manufacturer's instructions for use (IFU) (24), took pictures of the tests, read the result  
138 as positive or negative, and captured into the electronic data entry forms. Participants with a  
139 positive RDT were contacted by phone per request from the Department of Public Health within  
140 a twenty-four-hour period, informed of their result, and advised to isolate until they received their  
141 RT-qPCR result.

142

### 143 *Reference RT-qPCR standard*

144 The gold standard reference used was the SARS-CoV-2 RT-qPCR laboratory developed test  
145 through the Broad Institute CRSP, which is approved by the FDA under EUA. The test provides  
146 two cycle threshold (Ct) values, one for the nucleocapsid (N2) gene, and one for an internal  
147 positive control RNaseP gene. We compared the sensitivity of CareStart against both the  
148 qualitative binary RT-qPCR results and the Ct values of the N2 gene amplification reaction, as  
149 previously described (17).

150

### 151 *Statistical analyses*

152 We calculated sensitivity, specificity, PPV and NPV of the RDT from 2 x 2 contingency tables  
153 using RT-qPCR as the gold standard reference. Tests with undetermined CareStart or RT-qPCR  
154 results were excluded from these calculations (n=35; 5.2% of all tests). Sensitivity and specificity  
155 were further stratified and compared by presence of symptoms and quantitative Ct values. Median  
156 Ct values were compared using the non-parametric unpaired Mann-Whitney *U* test. 95% Pearson-  
157 Clopper confidence intervals (CI) were calculated for sensitivity and specificity estimates. Since  
158 RDTs have been reported to have high accuracy among symptomatic individuals (8, 15-17), we  
159 also tested whether presence of symptoms would increase the sensitivity of the CareStart RDT.  
160 Statistical analyses were conducted using R V3.6.0 (R Core Team 2020).

161

## 162 **Results**

163 We performed 666 CareStart RDTs from participants who provided verbal consent at the walk-up  
164 testing site (**Table 1 and Figure 1**). The 666 tests performed were comprised of 591 unique  
165 participants with 60 participants by chance receiving more than one test, with a total of 75 tests  
166 performed in addition to the first test per participant (**Supplementary Table 1**). Among the 591  
167 participants, 47.9% were residents from Holyoke, as identified by their residential zip codes. Just  
168 over half the participants (51.9%) identified as female. The mean age was 38.1, and 44.7% of  
169 participants identified as Hispanic or LatinX (**Table 1A**). Among Holyoke participants, 58.7%  
170 identified as Hispanic or LatinX (**Supplementary Table 2**), in line with the reported demographics  
171 by the American Community Survey for 2019, which shows that 54% of Holyoke residents  
172 identified as LatinX. Participants who tested positive for the CareStart RDT were more likely to  
173 report at least one symptom than asymptomatic counterparts (41.9% vs. 12.2%; Chi-square  $p <$   
174 0.0001) (**Table 1B**).

175 The study staff evaluated the usability of the CareStart devices. All tests showed a positive  
176 control band, indicating they were valid. However, plastic in some vial caps was slightly



177 malformed, making it difficult or impossible to properly cap the vials leading to 4 undetermined  
178 CareStart RDT results out of 666, since the operator could not load the RDT. Of the valid tests,  
179 we noted variable band intensities (**Figure 2**). The positive test line was sometimes so faint that  
180 a flashlight was necessary to see it.

181 To determine the accuracy of the CareStart RDT, we calculated the concordance between  
182 the RDT and RT-qPCR (**Table 2**). Using all RT-qPCR values below 40 as a positive reference,  
183 the sensitivity of the CareStart RDT was 48.1% (95% CI: 34.0%-62.4%), while the specificity was  
184 99.0% (95% CI: 97.8%-99.6%) (**Table 3**). Of the 666 visits, participants reported presence of  
185 symptoms 93 (14.0%) times (**Table 1B**). Cough was the most reported (n=40, 6.0%) symptom,  
186 while loss of smell or taste, a more specific COVID-19 symptom, was only reported in 19 visits  
187 (2.9%) (**Supplementary Table 3**). Due to the limited sample size, we only stratified individuals  
188 tested by presence (n=93) or absence (n=573) of symptoms to test the CareStart RDT accuracy  
189 as a function of symptoms. The sensitivity of CareStart RDT in symptomatic individuals was  
190 46.4% (95% CI: 27.5%-66.1%), and the specificity was 100% (95% CI: 95%-100%)  
191 (**Supplementary Table 4A and 4B**). In asymptomatic individuals, the sensitivity of the CareStart  
192 RDT was 52.2% (95% CI: 30.6%-73.2%), and the specificity was 99.4% (95% CI: 98.3%-99.9%)  
193 (**Supplementary Table 4C and 4D**).

194 Next, we used Ct values for amplification of the N2 target as a proxy for viral load, where  
195 higher Ct values reflected low viral loads, as previously reported (25). The Ct values of samples  
196 recorded as negative using the CareStart RDT were significantly higher than positive counterparts  
197 (Mann Whitney *U* p-value < 0.0001, **Figure 3**). Therefore, we also performed a subset analysis  
198 where we only considered samples with a Ct < 30 as positive (**Supplementary Table 5A**). Using  
199 this cut-off, the CareStart RDT sensitivity and specificity were 64.9% (95% CI: 47.5%-79.8%) and  
200 99.3% (95% CI: 98.3%-99.8%), respectively (**Supplementary Table 5B**). Although the CareStart  
201 RDT EUA does not indicate a specific Ct threshold for the positivity of the comparator RT-qPCR

202 (24), these data suggest that applying a more stringent Ct value threshold moderately improves  
203 the sensitivity of the CareStart RDT.

204 Positive and negative predictive values of diagnostic tests depend on the prevalence of  
205 infections in a population, where a higher prevalence increases the PPV at the expense of the  
206 NPV (26). We calculated the PPV and NPV values as a function of prevalence rates up to 10%,  
207 where the PPV steeply dropped in prevalence rates lower than 5% (**Figure 4**). At a sensitivity of  
208 49% and specificity of 99.5% (**Table 3**), the PPV of CareStart was 49.7% at a SARS-CoV-2  
209 infection prevalence of 1%, and 91.6% at a prevalence of 10%. In contrast, the NPV was 99.5%  
210 at a prevalence of 1%, and 94.6% at a prevalence of 10%.

211 Finally, our cohort included individuals who presented to the testing site multiple times,  
212 who had at least one positive RT-qPCR test result. Therefore, we performed an exploratory  
213 analysis of their longitudinal test results (**Supplementary Table 1 and Figure 5**). We enrolled 5  
214 participants who converted from a negative to positive on RT-qPCR tests, all of which were  
215 accurately detected as positive by the RDT. Two participants with both positive RT-qPCR and  
216 RDT test results reverted to negative test results on both platforms. However, one participant  
217 converted from a positive to negative RDT test result but was detected as positive by the RT-  
218 qPCR on the second test, which was conducted in less than a week.

219

## 220 **Discussion**

221 Antigen-detecting RDTs could provide a scalable and affordable alternative to molecular  
222 tests (27). In this study, we present a prospective evaluation of the CareStart antigen-detecting  
223 RDT for SARS-CoV-2 detection in a walk-up community COVID-19 testing site in Holyoke,  
224 Western Massachusetts. The SARS-CoV-2 testing gap refers to the disparity between where  
225 communities rank with respect to numbers of tests performed per 100,000 individuals, and where  
226 they rank with respect to SARS-CoV-2 positivity rates in each state (28). Equitable implementation

227 of testing should lead to higher numbers of tests performed per capita in communities with higher  
228 proportions of COVID-19 cases (29). In the state of Massachusetts, the SARS-CoV-2 testing gap,  
229 was higher in communities with a high social vulnerability index, including Holyoke, highlighting  
230 the socioeconomic disparities underlying access to COVID-19 testing (28). Thus, scaling up  
231 affordable tests such as antigen-detecting RDTs can help fill this testing gap, following evaluation  
232 of their accuracy and implementation feasibility.

233         Compared to a RT-qPCR-based test, we found a much lower sensitivity (49.0%) than what  
234 was reported in the FDA package insert (87.2%), which was restricted to 39 symptomatic  
235 individuals within 5 days of symptom onset (24). However, this sensitivity was consistent with the  
236 reported sensitivity of CareStart in asymptomatic individuals recruited in a recent study at  
237 Lawrence General Hospital in Massachusetts (84.8%) (17). Compared to the Abbott BinaxNOW  
238 RDT, which has been validated in several studies including a recent study in Massachusetts, the  
239 sensitivity of the CareStart RDT was lower overall and when using a Ct positivity cutoff of  $\leq 30$   
240 (15). The specificity of both tests was comparable at nearly  $> 99\%$ . Consistent with several  
241 studies, the sensitivity of antigen detecting RDTs was modest in individuals with no or mild  
242 symptoms (8, 14-16, 20). Although viral loads (30) and recovery of viable virus (31) peak in the  
243 early days following symptom onset, transmission by asymptomatic individuals remains a main  
244 driver of the pandemic (6), especially since absence of symptoms removes the prompt to  
245 quarantine. Therefore, implementation of antigen-detecting RDTs needs to weigh the benefits of  
246 rapid detection of SARS-CoV-2-infected individuals with the lower sensitivity of these tests in  
247 asymptomatic carriers (27). On the other hand, the high specificity of these tests reduces the  
248 probability of false positive SARS-CoV-2 test results, that would have otherwise led to restrictions  
249 and inconveniences that may interfere with the livelihood of these individuals.

250         Evaluation of RDTs against a highly sensitive gold standard such as RT-qPCR are  
251 important to define performance characteristics. The RT-qPCR cycle threshold (Ct) values had a

252 clear impact on the sensitivity of the CareStart RDT, where concordant results showed lower Ct  
253 values. In contrast, discordant results had higher Ct values, a proxy for lower viral load, as  
254 reported in other evaluations (15, 17, 32). Consistent with this, the CareStart RDT sensitivity  
255 improved with a RT-qPCR positivity Ct cut-off of < 30. These data suggest that the CareStart RDT  
256 positivity meant higher viral load, which correlates with infectivity of cells *in vitro* (33), and likely  
257 transmissibility. Individuals vaccinated with the Pfizer/BioNtech BNT162b2 vaccine, with  
258 breakthrough SARS-CoV-2 infections have been reported to show higher Ct values post-  
259 vaccination than unvaccinated counterparts, which correlates with lower viral loads (34). The  
260 implication, however, is that vaccinated individuals with breakthrough SARS-CoV-2 infections, will  
261 be more difficult to detect by antigen-detecting RDT with similar performance characteristics to  
262 CareStart. In a study in skilled nursing facility in Chicago, few and mostly asymptomatic break-  
263 through infections were identified post-vaccination (35). However, two were hospitalized and one  
264 died of COVID-19, suggesting that false negative diagnosis of SARS-CoV-2 infections are likely  
265 in postvaccination breakthrough infections (35). Therefore, it is crucial to evaluate the accuracy  
266 of RDTs in populations with high vaccination rates. Furthermore, false negative results of antigen-  
267 detecting RDTs may be caused by SARS-CoV-2 variants, which may be more transmissible (36).  
268 In laboratory studies, lower RT-qPCR Ct values were shown to correlate with increased recovery  
269 of viable virus (31, 37). However, epidemiological studies to support the higher contagiousness  
270 of individuals with lower Ct values are still lacking. Furthermore, our study shows overlapping RT-  
271 qPCR Ct values that could be either detected as positive or negative by the CareStart RDTs.  
272 Furthermore, 4 out of 26 negative RDT tests results corresponding to a positive RT-qPCR test  
273 result showed relatively low RT-qPCR Ct values (Ct < 25), indicating that false negative RDT  
274 results can occur even at high viral loads. Thus, to understand the public health implications of  
275 test results, it is imperative to definitively determine the infectiousness of individuals with a positive  
276 RT-qPCR, but negative RDT result, even if those negative calls only occurred occasionally.

277           Although our sample of repeat testers was limited, it suggested that individuals who  
278 recently converted from negative to positive RT-qPCR test, i.e. recently acquired SARS-CoV-2  
279 infection, were easily detectable by the CareStart RDT. Recently infected individuals have been  
280 shown to be more contagious (25). Samples from these recently infected individuals had low Ct  
281 values, and were thus more likely to transmit the virus (33). Alternatively, the one participant with  
282 a “false negative” RDT result after testing positive twice with the RT-qPCR, showed a relatively  
283 high RT-qPCR Ct value of 36.4 on the second discordant result, suggesting lower  
284 contagiousness. Repeat testing may be influenced by school or work requirements and may  
285 reflect a population with a higher susceptibility to exposure such as health care workers.  
286 Therefore, this limited sample supports the potential usefulness of serial rapid antigen testing in  
287 detecting recent infections to implement containment measures and merits further study (38).  
288 Importantly, the public health benefits of serial testing with RDTs should be studied further.

289           There are several advantages to rapid testing. CareStart has a lower turnaround time than  
290 RT-qPCR, including 10 minutes to run the test on site where most of the test results were visible  
291 in 3-4 minutes. Infected individuals can be notified of their status and begin isolation immediately,  
292 resulting in less transmission to contacts compared to tests with longer turnaround times. In  
293 addition, using anterior nasal swabs instead of the internationally accepted gold standard  
294 nasopharyngeal swabs increases the acceptability of testing. However, it may also compromise  
295 the sensitivity of antigen detecting RDTs, although a recent evaluation of swab types disputes  
296 this possibility (39). The test is simple, and requires little training to be performed, making it more  
297 amenable to self-administration and home testing. The price of RDTs is gradually decreasing to  
298 become more affordable. Some individuals might test by RDT who would otherwise not be tested  
299 at all. Therefore, a formal assessment of the public health impacts of RDTs should be conducted  
300 in future studies.

301           A few factors may have compromised the performance characteristics of CareStart in this  
302 study. We had limited control over or ability to monitor the order by which the two bilateral nasal  
303 swabs were collected because of embedding the study in a ‘real world’ testing program. It is  
304 possible that performing the PCR swab first may decrease the available viral load for the antigen  
305 test. However, a recent evaluation of the Abbott BinaxNOW suggested that the order of swabs  
306 had little impact on the test result (20). The tests were analyzed indoors to minimize temperature  
307 fluctuations. However, the environmental temperature was not systematically monitored in this  
308 semi-indoor setting (foyer of the War Memorial Building, Holyoke, MA). Since the study was  
309 performed during the winter in Massachusetts, the tests were generally conducted at cold  
310 temperatures, which could impact the RDT performance (15, 40). These results are, hence,  
311 reflective of a real-world evaluation scenario, where lower temperatures and seasonal fluctuations  
312 are expected in regions such as Massachusetts. Finally, study was conducted at the time when  
313 vaccination against SARS-CoV-2 was low, which may affect the generalizability of these findings.

314           In conclusion, RDTs such as CareStart, can support SARS-CoV-2 testing efforts in  
315 minimally or asymptomatic individuals. However, the impact of the limited sensitivity of these tests  
316 on their positive predictive values reinforce caution. The moderate sensitivity of these tests means  
317 that some potentially infectious individuals may be classified as SARS-CoV-2-negative.  
318 Therefore, implementing RDTs for travel, home testing, or to guide re-openings of schools and  
319 workplaces should be interpreted with caution and the utility of RDTs in each of these use cases  
320 should be carefully evaluated. Furthermore, implementation studies to analyze their usefulness  
321 and acceptability by both users and providers are necessary.

322

323

| <b>Demographics</b>                                                                                                                                                                                                                                                                  | <b>Always Undetermined (N=3)</b>                                                   | <b>Always Negative (N=558)</b>                                                                     | <b>Ever Positive (N=30)</b>                                                            | <b>Overall (N=591)</b>                                                                               |
|--------------------------------------------------------------------------------------------------------------------------------------------------------------------------------------------------------------------------------------------------------------------------------------|------------------------------------------------------------------------------------|----------------------------------------------------------------------------------------------------|----------------------------------------------------------------------------------------|------------------------------------------------------------------------------------------------------|
| <b>Age (Years)</b><br>Mean (SD)<br>Median [Min, Max]                                                                                                                                                                                                                                 | 25.3 (3.51)<br>25 [22, 29]                                                         | 38.2 (17.9)<br>36 [1, 85]                                                                          | 37.4 (15.4)<br>34.5 [16, 75]                                                           | 38.1 (17.8)<br>36 [1, 85]                                                                            |
| <b>Sex</b><br>Female<br>Male<br>Non-binary<br>Prefer not to answer<br>Not listed                                                                                                                                                                                                     | 2 (66.7%)<br>1 (33.3%)<br>0 (0%)<br>0 (0%)<br>0 (0%)                               | 294 (52.7%)<br>236 (42.3%)<br>4 (0.7%)<br>24 (4.3%)<br>0 (0%)                                      | 11 (36.7%)<br>14 (46.7%)<br>0 (0%)<br>4 (13.3%)<br>1 (3.3%)                            | 307 (51.9%)<br>251 (42.5%)<br>4 (0.7%)<br>28 (4.7%)<br>1 (0.2%)                                      |
| <b>Lives in Holyoke zip code</b><br>Yes<br>No                                                                                                                                                                                                                                        | 3 (100%)<br>0 (0%)                                                                 | 292 (52.3%)<br>266 (47.7%)                                                                         | 13 (43.3%)<br>17 (56.7%)                                                               | 308 (52.1%)<br>283 (47.9%)                                                                           |
| <b>Race/Ethnicity category</b><br>Hispanic or LatinX<br>White Non-Hispanic<br>Asian Non-Hispanic<br>Black or African American Non-Hispanic<br>Native Hawaiian or Other Pacific Islander Non-Hispanic<br>Other Non-Hispanic<br>Two or more races Non-Hispanic<br>Prefer not to answer | 1 (33.3%)<br>2 (66.7%)<br>0 (0%)<br>0 (0%)<br>0 (0%)<br>0 (0%)<br>0 (0%)<br>0 (0%) | 248 (44.4%)<br>262 (47%)<br>5 (0.9%)<br>15 (2.7%)<br>1 (0.2%)<br>8 (1.4%)<br>4 (0.7%)<br>15 (2.7%) | 15 (50.0%)<br>14 (46.7%)<br>0 (0%)<br>0 (0%)<br>0 (0%)<br>0 (0%)<br>0 (0%)<br>1 (3.3%) | 264 (44.7%)<br>278 (47.0%)<br>5 (0.8%)<br>15 (2.5%)<br>1 (0.2%)<br>8 (1.4%)<br>4 (0.7%)<br>16 (2.7%) |
| <b>Repeat tester</b><br>No<br>Yes                                                                                                                                                                                                                                                    | 3 (100%)<br>0 (0%)                                                                 | 506 (90.7%)<br>52 (9.3%)                                                                           | 22 (73.3%)<br>8 (26.7%)                                                                | 531 (89.8%)<br>60 (10.2%)                                                                            |

324  
325 **Table 1A:** Demographics of unique study participants who enrolled in the CareStart Rapid  
326 Antigen Test evaluation at the Stop the Spread COVID-19 testing site in Holyoke, Massachusetts.

327  
328

|                            | <b>Negative<br/>(N=631)</b> | <b>Positive<br/>(N=31)</b> | <b>Undetermined<br/>(N=4)</b> | <b>Overall<br/>(N=666)</b> |
|----------------------------|-----------------------------|----------------------------|-------------------------------|----------------------------|
| <b>Any symptoms</b>        |                             |                            |                               |                            |
| No                         | 554 (87.8%)                 | 18 (58.1%)                 | 1 (25.0%)                     | 573 (86%)                  |
| Yes                        | 77 (12.2%)                  | 13 (41.9%)                 | 3 (75.0%)                     | 93 (14%)                   |
| <b>Exposure</b>            |                             |                            |                               |                            |
| Confirmed or suspected     | 196 (31.1%)                 | 17 (54.8%)                 | 4 (100%)                      | 217 (32.6%)                |
| No exposure                | 433 (68.6%)                 | 14 (45.2%)                 | 0 (0%)                        | 447 (67.1%)                |
| Did not answer             | 2 (0.3%)                    | 0 (0%)                     | 0 (0%)                        | 2 (0.3%)                   |
| <b>Prior COVID-19 test</b> |                             |                            |                               |                            |
| No                         | 110 (17.4%)                 | 9 (29.0%)                  | 2 (50.0%)                     | 121 (18.2%)                |
| Yes                        | 519 (82.3%)                 | 22 (71.0%)                 | 2 (50.0%)                     | 543 (81.5%)                |
| Missing                    | 2 (0.3%)                    | 0 (0%)                     | 0 (0%)                        | 2 (0.3%)                   |

329

330 **Table 1B:** Tester symptoms, exposure history and prior COVID-19 testing per each CareStart  
 331 testing occurrence, including repeated tests from the same participants.

332

333



| Result of N gene RT-qPCR     | Negative<br>(N=583) | Positive<br>(N=52) | Undetermined<br>(N=31) | Overall<br>(N=666) |
|------------------------------|---------------------|--------------------|------------------------|--------------------|
| <b>CareStart test result</b> |                     |                    |                        |                    |
| Negative                     | 577 (99%)           | 26 (50%)           | 28 (90.3%)             | 631 (94.7%)        |
| Positive                     | 3 (0.5%)            | 25 (48.1%)         | 3 (9.7%)               | 31 (4.7%)          |
| Undetermined                 | 3 (0.5%)            | 1 (1.9%)           | 0 (0%)                 | 4 (0.6%)           |

334

335 **Table 2:** Concordance between CareStart Test Results and RT-qPCR test results

|                           | n   | Total tests | Performance Characteristic | Estimate (%) | 95% Confidence Interval |
|---------------------------|-----|-------------|----------------------------|--------------|-------------------------|
| <b>Rapid Test Results</b> |     |             |                            |              |                         |
| Positive                  | 25  | 51          | Sensitivity                | 49.0%        | (34.8% - 63.4%)         |
| Negative                  | 577 | 580         | Specificity                | 99.5%        | (98.5% - 99.9%)         |

336

337 **Table 3:** Performance characteristics of CareStart test results benchmarked against the RT-

338 qPCR gold standard (excluding undetermined results).

339 **Figure Legends:**

340 **Figure 1:** Number of CareStart rapid antigen test administered by date (n=666). The bar colors  
341 reflect the results of the rapid tests on different days.

342 **Figure 2:** Examples of images of CareStart rapid test showing variable band intensities.

343 **Figure 3:** N2 gene RT-qPCR Cycle threshold (Ct) values corresponding to positive and negative  
344 CareStart rapid antigen test results for all RT-qPCR positive samples (n=52).

345 **Figure 4:** Calculated positive (left) and negative predictive values (right) based on the CareStart  
346 performance characteristics and different prevalence estimates of SARS-CoV-2 infections.

347 **Figure 5:** Individuals who enrolled in the study multiple times and had at least one positive gold  
348 standard RT-qPCR reference (n=11). The point colors reflect the different combinations of RT-  
349 qPCR and CareStart rapid test results. The numbers above the point correspond to Ct values of  
350 the RT-qPCR.

351

352

353 **Acknowledgements**

354 The Holyoke Board of Health was instrumental in coordinating study logistics with Fallon  
355 Ambulance Services who performed the swabs for RT-qPCR. The MA Department of Public  
356 Health and Ginko Bioworks donated the Access Bio testing kits and anterior nares SteriPack  
357 swabs for this study. The study was supported by an award from the Massachusetts Life Sciences  
358 Center Accelerating Coronavirus Testing Solutions (A.C.T.S) and the Sullivan Family Foundation  
359 (LCI).

360

361

362 **Potential conflicts of interest**

363 None.

364

365

366 **References**

- 367 1. Dong E, Du H, Gardner L. An interactive web-based dashboard to track COVID-  
368 19 in real time. *Lancet Infect Dis.* 2020;20(5):533-4. Epub 2020/02/23. doi:  
369 10.1016/S1473-3099(20)30120-1. PubMed PMID: 32087114; PMCID: PMC7159018.
- 370 2. Liu K, Fang YY, Deng Y, Liu W, Wang MF, Ma JP, Xiao W, Wang YN, Zhong MH,  
371 Li CH, Li GC, Liu HG. Clinical characteristics of novel coronavirus cases in tertiary  
372 hospitals in Hubei Province. *Chin Med J (Engl).* 2020;133(9):1025-31. Epub 2020/02/12.  
373 doi: 10.1097/CM9.0000000000000744. PubMed PMID: 32044814; PMCID:  
374 PMC7147277.
- 375 3. Ramdas K, Darzi A, Jain S. 'Test, re-test, re-test': using inaccurate tests to greatly  
376 increase the accuracy of COVID-19 testing. *Nat Med.* 2020;26(6):810-1. Epub  
377 2020/05/14. doi: 10.1038/s41591-020-0891-7. PubMed PMID: 32398878; PMCID:  
378 PMC7215136.
- 379 4. Hellou MM, Gorska A, Mazzaferri F, Cremonini E, Gentilotti E, De Nardo P, Poran  
380 I, Leeflang M, Tacconelli E, Paul M. Nucleic-acid-amplification tests from respiratory  
381 samples for the diagnosis of coronavirus infections: systematic review and meta-analysis.  
382 *Clin Microbiol Infect.* 2020. Epub 2020/11/15. doi: 10.1016/j.cmi.2020.11.002. PubMed  
383 PMID: 33188933; PMCID: PMC7657614.
- 384 5. Brown RCH, Kelly D, Wilkinson D, Savulescu J. The scientific and ethical feasibility  
385 of immunity passports. *Lancet Infect Dis.* 2020. Epub 2020/10/20. doi: 10.1016/S1473-  
386 3099(20)30766-0. PubMed PMID: 33075284; PMCID: PMC7567527.
- 387 6. Oran DP, Topol EJ. Prevalence of Asymptomatic SARS-CoV-2 Infection : A  
388 Narrative Review. *Ann Intern Med.* 2020;173(5):362-7. Epub 2020/06/04. doi:  
389 10.7326/M20-3012. PubMed PMID: 32491919; PMCID: PMC7281624.
- 390 7. Quilty BJ, Clifford S, Hellewell J, Russell TW, Kucharski AJ, Flasche S, Edmunds  
391 WJ, Centre for the Mathematical Modelling of Infectious Diseases C-wg. Quarantine and  
392 testing strategies in contact tracing for SARS-CoV-2: a modelling study. *Lancet Public  
393 Health.* 2021;6(3):e175-e83. Epub 2021/01/24. doi: 10.1016/S2468-2667(20)30308-X.  
394 PubMed PMID: 33484644; PMCID: PMC7826085.
- 395 8. Pray IW, Ford L, Cole D, Lee C, Bigouette JP, Abedi GR, Bushman D, Delahoy  
396 MJ, Currie D, Cherney B, Kirby M, Fajardo G, Caudill M, Langolf K, Kahrs J, Kelly P, Pitts  
397 C, Lim A, Aulik N, Tamin A, Harcourt JL, Queen K, Zhang J, Whitaker B, Browne H,  
398 Medrzycki M, Shewmaker P, Folster J, Bankamp B, Bowen MD, Thornburg NJ, Goffard  
399 K, Limbago B, Bateman A, Tate JE, Gieryn D, Kirking HL, Westergaard R, Killerby M,  
400 Group CC-SL. Performance of an Antigen-Based Test for Asymptomatic and  
401 Symptomatic SARS-CoV-2 Testing at Two University Campuses - Wisconsin,  
402 September-October 2020. *MMWR Morb Mortal Wkly Rep.* 2021;69(5152):1642-7. Epub  
403 2021/01/01. doi: 10.15585/mmwr.mm695152a3. PubMed PMID: 33382679.
- 404 9. Hopman J, Allegranzi B, Mehtar S. Managing COVID-19 in Low- and Middle-  
405 Income Countries. *JAMA.* 2020;323(16):1549-50. Epub 2020/03/17. doi:  
406 10.1001/jama.2020.4169. PubMed PMID: 32176764.
- 407 10. WHO. Antigen-detection in the diagnosis of SARS-CoV-2 infection using rapid  
408 immunoassays. Interim Guidance. 2020;11 September 2020(Accessed online:

- 409 [https://www.who.int/publications/i/item/antigen-detection-in-the-diagnosis-of-sars-cov-](https://www.who.int/publications/i/item/antigen-detection-in-the-diagnosis-of-sars-cov-2-infection-using-rapid-immunoassays)  
410 [2infection-using-rapid-immunoassays](https://www.who.int/publications/i/item/antigen-detection-in-the-diagnosis-of-sars-cov-2-infection-using-rapid-immunoassays)).
- 411 11. Dinnes J, Deeks JJ, Berhane S, Taylor M, Adriano A, Davenport C, Dittrich S,  
412 Emperador D, Takwoingi Y, Cunningham J, Beese S, Domen J, Dretzke J, Ferrante di  
413 Ruffano L, Harris IM, Price MJ, Taylor-Phillips S, Hooft L, Leeftang MM, McInnes MD,  
414 Spijker R, Van den Bruel A, Cochrane C-DTAG. Rapid, point-of-care antigen and  
415 molecular-based tests for diagnosis of SARS-CoV-2 infection. *Cochrane Database Syst*  
416 *Rev.* 2021;3:CD013705. Epub 2021/03/25. doi: 10.1002/14651858.CD013705.pub2.  
417 PubMed PMID: 33760236.
- 418 12. FDA. In Vitro Diagnostics EUAs. . U S Food and Drug Administration.  
419 2021;Published online March 8, 2021.(Accessed March 9, 2021.  
420 [https://www.fda.gov/medical-devices/coronavirus-disease-2019-covid-19-emergency-](https://www.fda.gov/medical-devices/coronavirus-disease-2019-covid-19-emergency-use-authorizations-medical-devices/vitro-diagnostics-euas)  
421 [use-authorizations-medical-devices/vitro-diagnostics-euas](https://www.fda.gov/medical-devices/coronavirus-disease-2019-covid-19-emergency-use-authorizations-medical-devices/vitro-diagnostics-euas)).
- 422 13. Young S, Taylor SN, Cammarata CL, Varnado KG, Roger-Dalbert C, Montano A,  
423 Griego-Fullbright C, Burgard C, Fernandez C, Eckert K, Andrews JC, Ren H, Allen J,  
424 Ackerman R, Cooper CK. Clinical evaluation of BD Veritor SARS-CoV-2 point-of-care test  
425 performance compared to PCR-based testing and versus the Sofia 2 SARS Antigen point-  
426 of-care test. *J Clin Microbiol.* 2020. Epub 2020/10/08. doi: 10.1128/JCM.02338-20.  
427 PubMed PMID: 33023911.
- 428 14. Landaas ET, Storm ML, Tollanes MC, Barlinn R, Kran AB, Bragstad K, Christensen  
429 A, Andreassen T. Diagnostic performance of a SARS-CoV-2 rapid antigen test in a large,  
430 Norwegian cohort. *J Clin Virol.* 2021;137:104789. Epub 2021/03/20. doi:  
431 10.1016/j.jcv.2021.104789. PubMed PMID: 33736946; PMCID: PMC7944803.
- 432 15. Pollock NR, Jacobs JR, Tran K, Cranston AE, Smith S, O'Kane CY, Roady TJ,  
433 Moran A, Scarry A, Carroll M, Volinsky L, Perez G, Patel P, Gabriel S, Lennon NJ, Madoff  
434 LC, Brown C, Smole SC. Performance and Implementation Evaluation of the Abbott  
435 BinaxNOW Rapid Antigen Test in a High-throughput Drive-through Community Testing  
436 Site in Massachusetts. *J Clin Microbiol.* 2021. Epub 2021/02/25. doi:  
437 10.1128/JCM.00083-21. PubMed PMID: 33622768.
- 438 16. Pilarowski G, Lebel P, Sunshine S, Liu J, Crawford E, Marquez C, Rubio L, Chamie  
439 G, Martinez J, Peng J, Black D, Wu W, Pak J, Laurie MT, Jones D, Miller S, Jacobo J,  
440 Rojas S, Rojas S, Nakamura R, Tulier-Laiwa V, Petersen M, Havlir DV, Consortium C,  
441 DeRisi J. Performance characteristics of a rapid SARS-CoV-2 antigen detection assay at  
442 a public plaza testing site in San Francisco. *J Infect Dis.* 2021. Epub 2021/01/05. doi:  
443 10.1093/infdis/jiaa802. PubMed PMID: 33394052; PMCID: PMC7799021.
- 444 17. Pollock NR, Tran K, Jacobs JR, Cranston AE, Smith S, O'Kane CY, Roady TJ,  
445 Moran M, Scarry A, Carroll M, Volinsky L, Perez G, Patel P, Gabriel S, Lennon NJ, Madoff  
446 LC, Brown C, Smole SC. Performance and Operational Evaluation of the Access Bio  
447 CareStart Rapid Antigen Test in a High-throughput Drive-through Community Testing Site  
448 in Massachusetts. *MedRxiv.* 2021;Pre-print:  
449 <https://www.medrxiv.org/content/10.1101/2021.03.07.21253101v1.full-text>. (Accessed  
450 online: April 5, 2021).
- 451 18. Smith RL, Gibson LL, Martinez PP, Ke R, Mirza A, Conte M, Gallagher N, Conte  
452 A, Wang L, Fredrickson R, Edmonson DC, Baughman ME, Chiu KK, Choi H, Jensen TW,

- 453 Scardina KR, Bradley S, Gloss SL, Reinhart C, Yedetore J, Owens AN, Broach J, Barton  
454 B, Lazar P, Hennes D, Young T, Dunnett A, Robinson ML, Mostafa HH, Pekosz A,  
455 Manabe YC, Heetderks WJ, McManus DD, Brooke CB. Longitudinal assessment of  
456 diagnostic test performance over the course of acute SARS-CoV-2 infection. medRxiv.  
457 2021. Epub 2021/04/02. doi: 10.1101/2021.03.19.21253964. PubMed PMID: 33791719;  
458 PMCID: PMC8010751.
- 459 19. Kilic A, Hiestand B, Palavecino E. Evaluation of Performance of the BD Veritor  
460 SARS-CoV-2 Chromatographic Immunoassay Test in COVID-19 Symptomatic Patients.  
461 J Clin Microbiol. 2021. Epub 2021/02/28. doi: 10.1128/JCM.00260-21. PubMed PMID:  
462 33637583.
- 463 20. Okoye NC, Barker AP, Curtis K, Orlandi RR, Snaveley EA, Wright C, Hanson KE,  
464 Pearson LN. Performance Characteristics of BinaxNOW COVID-19 Antigen Card for  
465 Screening Asymptomatic Individuals in a University Setting. J Clin Microbiol. 2021. Epub  
466 2021/01/30. doi: 10.1128/JCM.03282-20. PubMed PMID: 33509809.
- 467 21. FDA. Coronavirus (COVID-19) Update: FDA Continues to Advance Over-the-  
468 Counter and Other Screening Test Development. U S Food and Drug Administration.  
469 2021;Press Release, Published online: March 31, 2021.
- 470 22. Epidemiologists) CCoSaT. Update to the standardized surveillance case definition  
471 and national notification for 2019 novel coronavirus disease (COVID-19). infectious  
472 Disease Committee. 2020;Accessed online:  
473 [https://cdn.ymaws.com/www.cste.org/resource/resmgr/ps/positionstatement2020/Interi](https://cdn.ymaws.com/www.cste.org/resource/resmgr/ps/positionstatement2020/Interim-20-ID-02_COVID-19.pdf)  
474 [m-20-ID-02\\_COVID-19.pdf](https://cdn.ymaws.com/www.cste.org/resource/resmgr/ps/positionstatement2020/Interim-20-ID-02_COVID-19.pdf).
- 475 23. Clinical Research Sequencing Platform (CRSP) LatBloMaH. CRSP SARS-CoV-2  
476 Real-time Reverse Transcriptase (RT)-PCR Diagnostic Assay.  
477 <https://wwwfdagov/media/139858/download>.
- 478 24. Diagnostics A. CareStart COVID-19 Antigen: Rapid Diagnostic Test for the  
479 Detection of SARS-CoV-2 Antigen Accessed online: [https://accessbiodiagnosticsnet/wp-](https://accessbiodiagnosticsnet/wp-content/uploads/2021/02/EUA-accessbio-CareStart-Antigen-ifupdf)  
480 [content/uploads/2021/02/EUA-accessbio-CareStart-Antigen-ifupdf](https://accessbiodiagnosticsnet/wp-content/uploads/2021/02/EUA-accessbio-CareStart-Antigen-ifupdf). 2020;Instructions for  
481 Use Under Emergency Use Authorization.
- 482 25. Jaafar R, Aherfi S, Wurtz N, Grimaldier C, Hoang TV, Colson P, Raoult D, La Scola  
483 B. Correlation Between 3790 Quantitative Polymerase Chain Reaction–Positives  
484 Samples and Positive Cell Cultures, Including 1941 Severe Acute Respiratory Syndrome  
485 Coronavirus 2 Isolates. Clinical Infectious Diseases. 2020;Correspondence.
- 486 26. Hernaez R, Thrift AP. High Negative Predictive Value, Low Prevalence, and  
487 Spectrum Effect: Caution in the Interpretation. Clin Gastroenterol Hepatol.  
488 2017;15(9):1355-8. Epub 2017/05/16. doi: 10.1016/j.cgh.2017.05.002. PubMed PMID:  
489 28501535.
- 490 27. Syal K. Guidelines on newly identified limitations of diagnostic tools for COVID-19  
491 and consequences. J Med Virol. 2021;93(4):1837-42. Epub 2020/11/18. doi:  
492 10.1002/jmv.26673. PubMed PMID: 33200414; PMCID: PMC7753543.
- 493 28. Dryden-Peterson S, Velasquez GE, Stopka TJ, Davey S, Lockman S, Ojikutu BO.  
494 Disparities in SARS-CoV-2 Testing in Massachusetts During the COVID-19 Pandemic.  
495 JAMA Netw Open. 2021;4(2):e2037067. Epub 2021/02/10. doi:

- 496 10.1001/jamanetworkopen.2020.37067. PubMed PMID: 33560423; PMCID:  
497 PMC7873783.
- 498 29. Figueroa JF, Wadhera RK, Lee D, Yeh RW, Sommers BD. Community-Level  
499 Factors Associated With Racial And Ethnic Disparities In COVID-19 Rates In  
500 Massachusetts. *Health Aff (Millwood)*. 2020;39(11):1984-92. Epub 2020/08/28. doi:  
501 10.1377/hlthaff.2020.01040. PubMed PMID: 32853056.
- 502 30. Weiss A, Jellingso M, Sommer MOA. Spatial and temporal dynamics of SARS-  
503 CoV-2 in COVID-19 patients: A systematic review and meta-analysis. *EBioMedicine*.  
504 2020;58:102916. Epub 2020/07/28. doi: 10.1016/j.ebiom.2020.102916. PubMed PMID:  
505 32711256; PMCID: PMC7374142.
- 506 31. van Kampen JJA, van de Vijver D, Fraaij PLA, Haagmans BL, Lamers MM, Okba  
507 N, van den Akker JPC, Endeman H, Gommers D, Cornelissen JJ, Hoek RAS, van der  
508 Eerden MM, Hesselink DA, Metselaar HJ, Verbon A, de Steenwinkel JEM, Aron GI, van  
509 Gorp ECM, van Boheemen S, Voermans JC, Boucher CAB, Molenkamp R, Koopmans  
510 MPG, Geurtsvankessel C, van der Eijk AA. Duration and key determinants of infectious  
511 virus shedding in hospitalized patients with coronavirus disease-2019 (COVID-19). *Nat*  
512 *Commun*. 2021;12(1):267. Epub 2021/01/13. doi: 10.1038/s41467-020-20568-4.  
513 PubMed PMID: 33431879; PMCID: PMC7801729.
- 514 32. Perez-Garcia F, Romanyk J, Gomez-Herruz P, Arroyo T, Perez-Tanoira R, Linares  
515 M, Perez Ranz I, Labrador Ballester A, Moya Gutierrez H, Ruiz-Alvarez MJ, Cuadros-  
516 Gonzalez J. Diagnostic performance of CerTest and Panbio antigen rapid diagnostic tests  
517 to diagnose SARS-CoV-2 infection. *J Clin Virol*. 2021;137:104781. Epub 2021/02/28. doi:  
518 10.1016/j.jcv.2021.104781. PubMed PMID: 33639492; PMCID: PMC7897407.
- 519 33. Bullard J, Dust K, Funk D, Strong JE, Alexander D, Garnett L, Boodman C, Bello  
520 A, Hedley A, Schiffman Z, Doan K, Bastien N, Li Y, Van Caesele PG, Poliquin G.  
521 Predicting infectious SARS-CoV-2 from diagnostic samples. *Clinical infectious diseases*  
522 : an official publication of the Infectious Diseases Society of America. 2020. Epub  
523 2020/05/23. doi: 10.1093/cid/ciaa638. PubMed PMID: 32442256; PMCID: PMC7314198.
- 524 34. Levine-Tiefenbrun M, Yelin I, Katz R, Herzel E, Golan Z, Schreiber L, Wolf T,  
525 Nadler V, Ben-Tov A, Kuint J, Gazit S, Patalon T, Chodick G, Kishony R. Initial report of  
526 decreased SARS-CoV-2 viral load after inoculation with the BNT162b2 vaccine. *Nat Med*.  
527 2021. Epub 2021/03/31. doi: 10.1038/s41591-021-01316-7. PubMed PMID: 33782619.
- 528 35. Teran RA, Walblay KA, Shane EL, Xydis S, Gretsches S, Gagner A, Samala U, Choi  
529 H, Zelinski C, Black SR. Postvaccination SARS-CoV-2 Infections Among Skilled Nursing  
530 Facility Residents and Staff Members - Chicago, Illinois, December 2020-March 2021.  
531 *MMWR Morb Mortal Wkly Rep*. 2021;70(17):632-8. Epub 2021/04/30. doi:  
532 10.15585/mmwr.mm7017e1. PubMed PMID: 33914721; PMCID: PMC8084122  
533 Journal Editors form for disclosure of potential conflicts of interest. No potential conflicts of interest  
534 were disclosed.
- 535 36. Peng J, Liu J, Mann SA, Mitchell AM, Laurie MT, Sunshine S, Pilarowski G, Ayscue  
536 P, Kistler A, Vanaerschot M, Li LM, McGeever A, Chow ED, Marquez C, Nakamura R,  
537 Rubio L, Chamie G, Jones D, Jacobo J, Rojas S, Rojas S, Tulier-Laiwa V, Black D,  
538 Martinez J, Naso J, Schwab J, Petersen M, Havlir D, DeRisi J, Team ID. Estimation of  
539 secondary household attack rates for emergent spike L452R SARS-CoV-2 variants



540 detected by genomic surveillance at a community-based testing site in San Francisco.  
541 Clinical infectious diseases : an official publication of the Infectious Diseases Society of  
542 America. 2021. Epub 2021/04/01. doi: 10.1093/cid/ciab283. PubMed PMID: 33788923.  
543 37. Pekosz A, Parvu V, Li M, Andrews JC, Manabe YC, Kodosi S, Gary DS, Roger-  
544 Dalbert C, Leitch J, Cooper CK. Antigen-Based Testing but Not Real-Time Polymerase  
545 Chain Reaction Correlates With Severe Acute Respiratory Syndrome Coronavirus 2 Viral  
546 Culture. Clinical infectious diseases : an official publication of the Infectious Diseases  
547 Society of America. 2021. Epub 2021/01/23. doi: 10.1093/cid/ciaa1706. PubMed PMID:  
548 33479756; PMCID: PMC7929138.  
549 38. Mina MJ, Peto TE, Garcia-Finana M, Semple MG, Buchan IE. Clarifying the  
550 evidence on SARS-CoV-2 antigen rapid tests in public health responses to COVID-19.  
551 Lancet. 2021. Epub 2021/02/21. doi: 10.1016/S0140-6736(21)00425-6. PubMed PMID:  
552 33609444.  
553 39. Patriquin G, Davis I, Heinstein C, MacDonald J, Hatchette TF, LeBlanc JJ.  
554 Exploring alternative swabs for use in SARS-CoV-2 detection from the oropharynx and  
555 anterior nares. J Virol Methods. 2020;285:113948. Epub 2020/08/14. doi:  
556 10.1016/j.jviromet.2020.113948. PubMed PMID: 32783913; PMCID: PMC7415171.  
557 40. Haage V, Ferreira de Oliveira-Filho E, Moreira-Soto A, Kuhne A, Fischer C, Sacks  
558 JA, Corman VM, Muller MA, Drosten C, Drexler JF. Impaired performance of SARS-CoV-  
559 2 antigen-detecting rapid diagnostic tests at elevated and low temperatures. J Clin Virol.  
560 2021;138:104796. Epub 2021/03/28. doi: 10.1016/j.jcv.2021.104796. PubMed PMID:  
561 33773413; PMCID: PMC7962993.  
562

Figure 1:

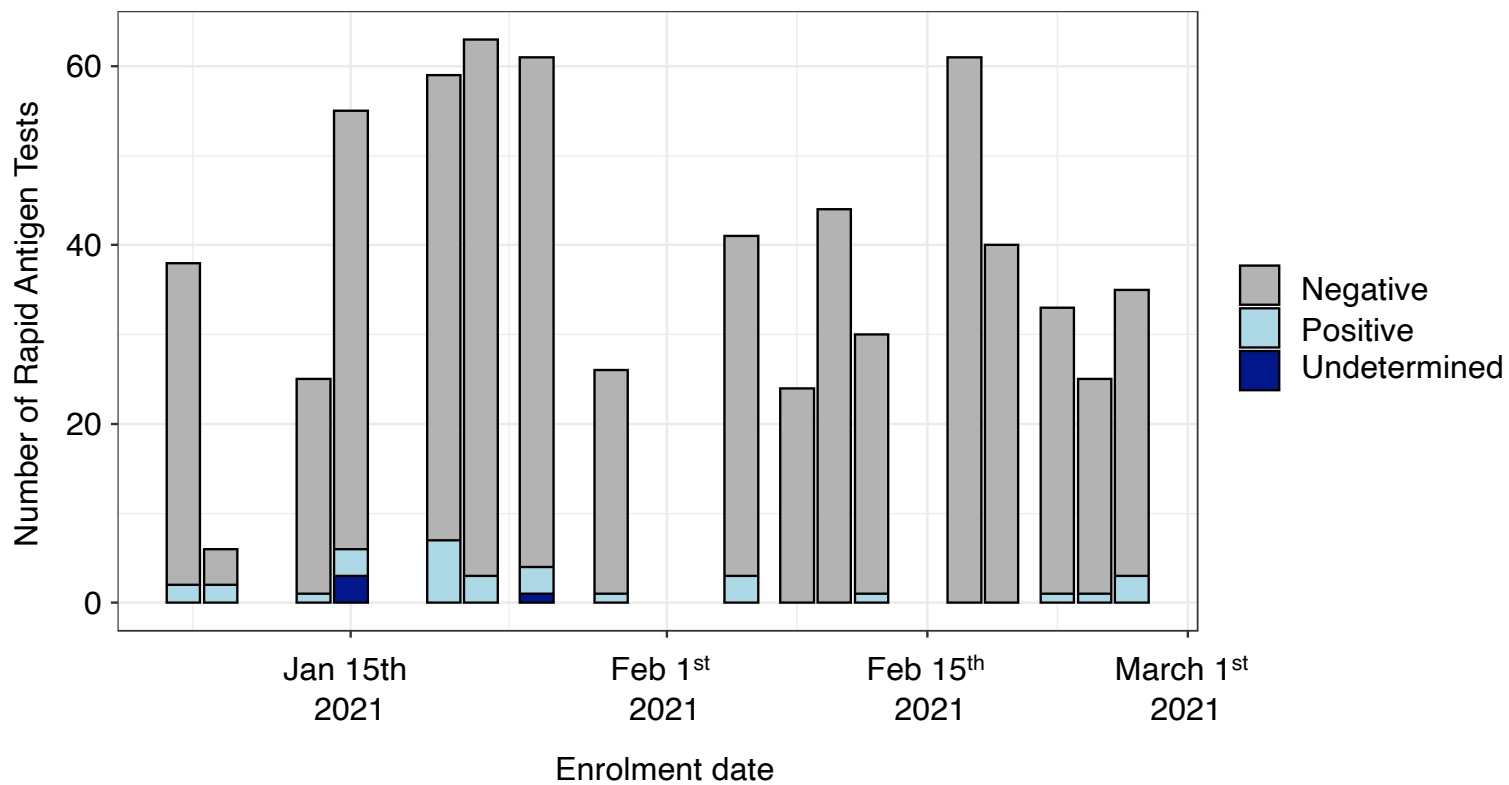

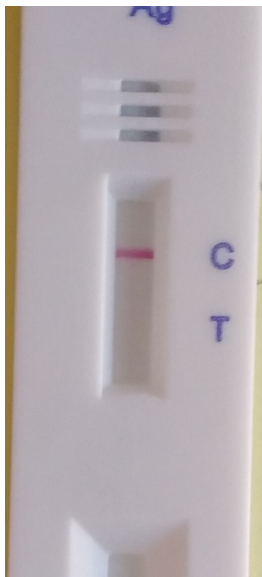

Negative

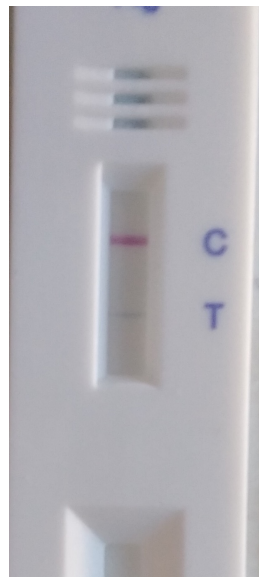

Positive  
(weak)

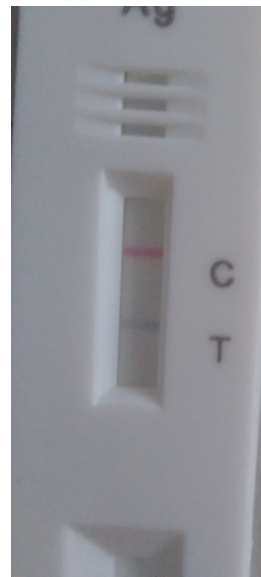

Positive  
(medium)

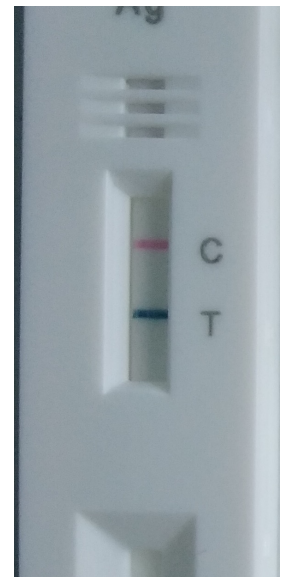

Positive  
(strong)

Figure 3:

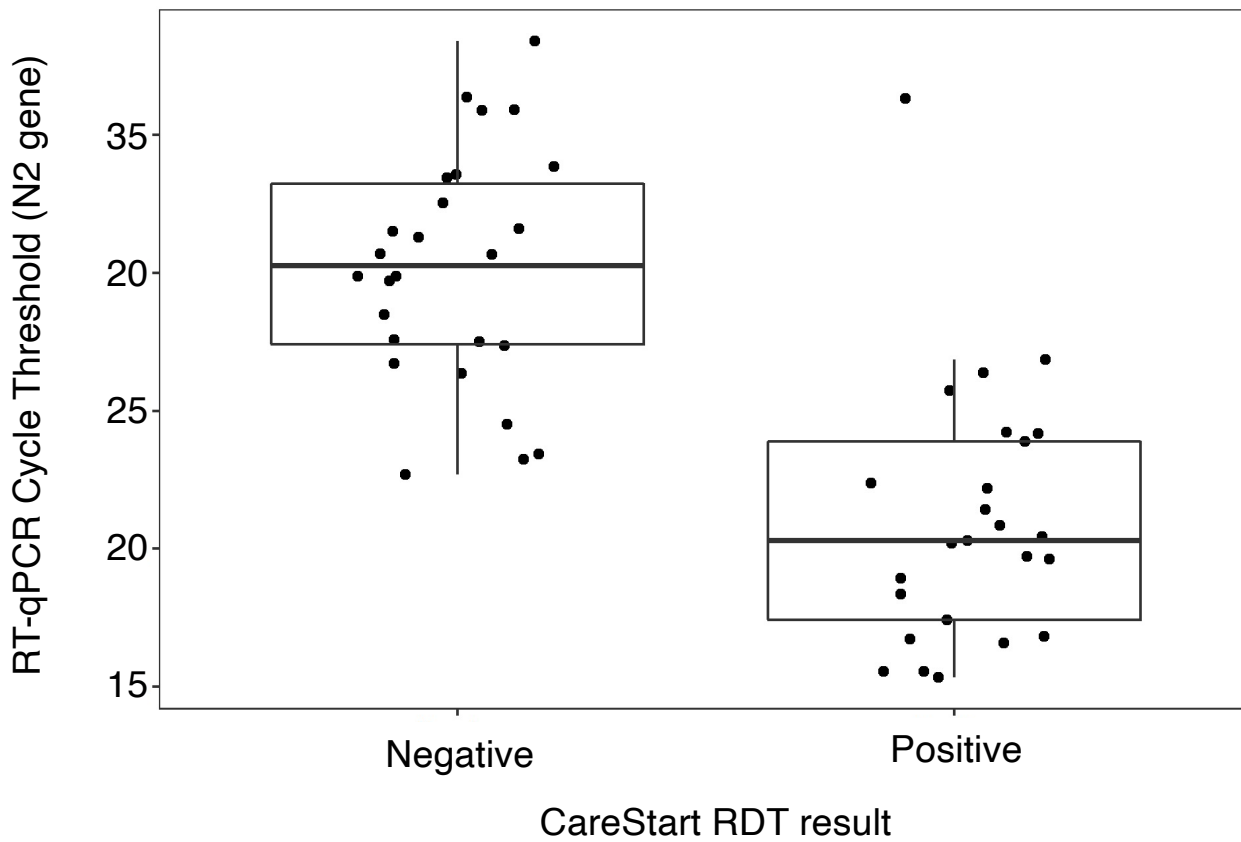

Figure 4:

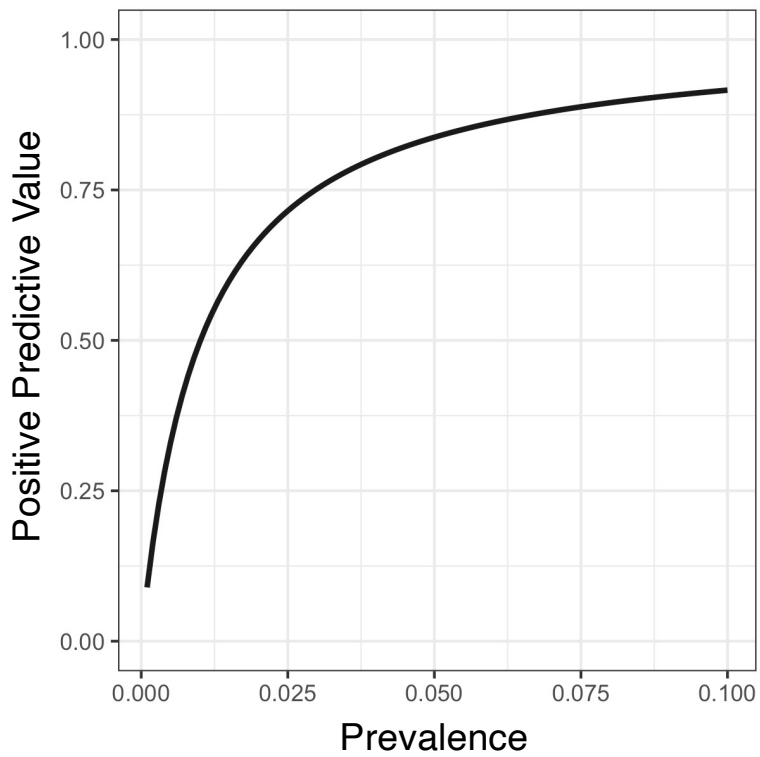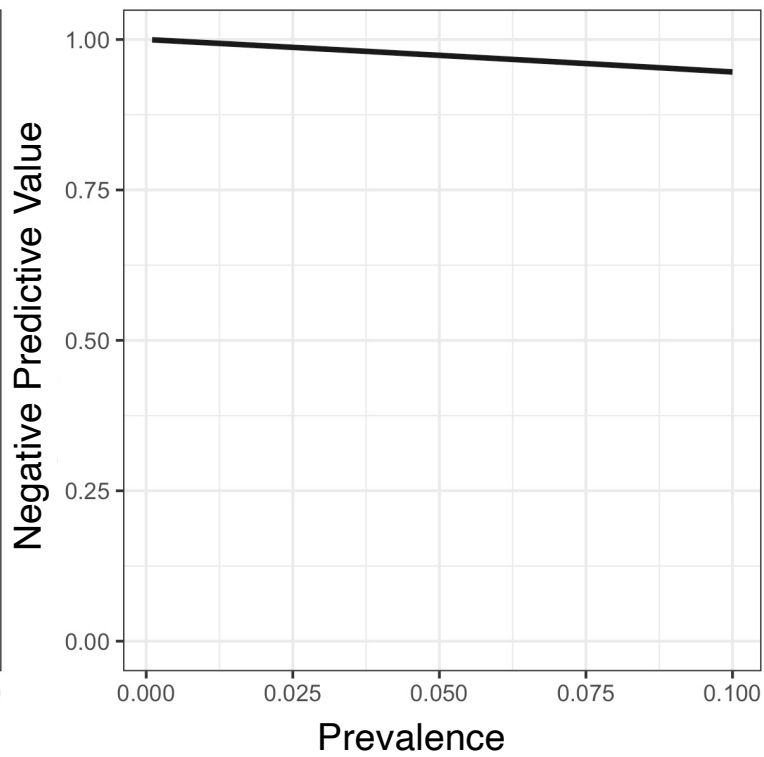

Figure 5:

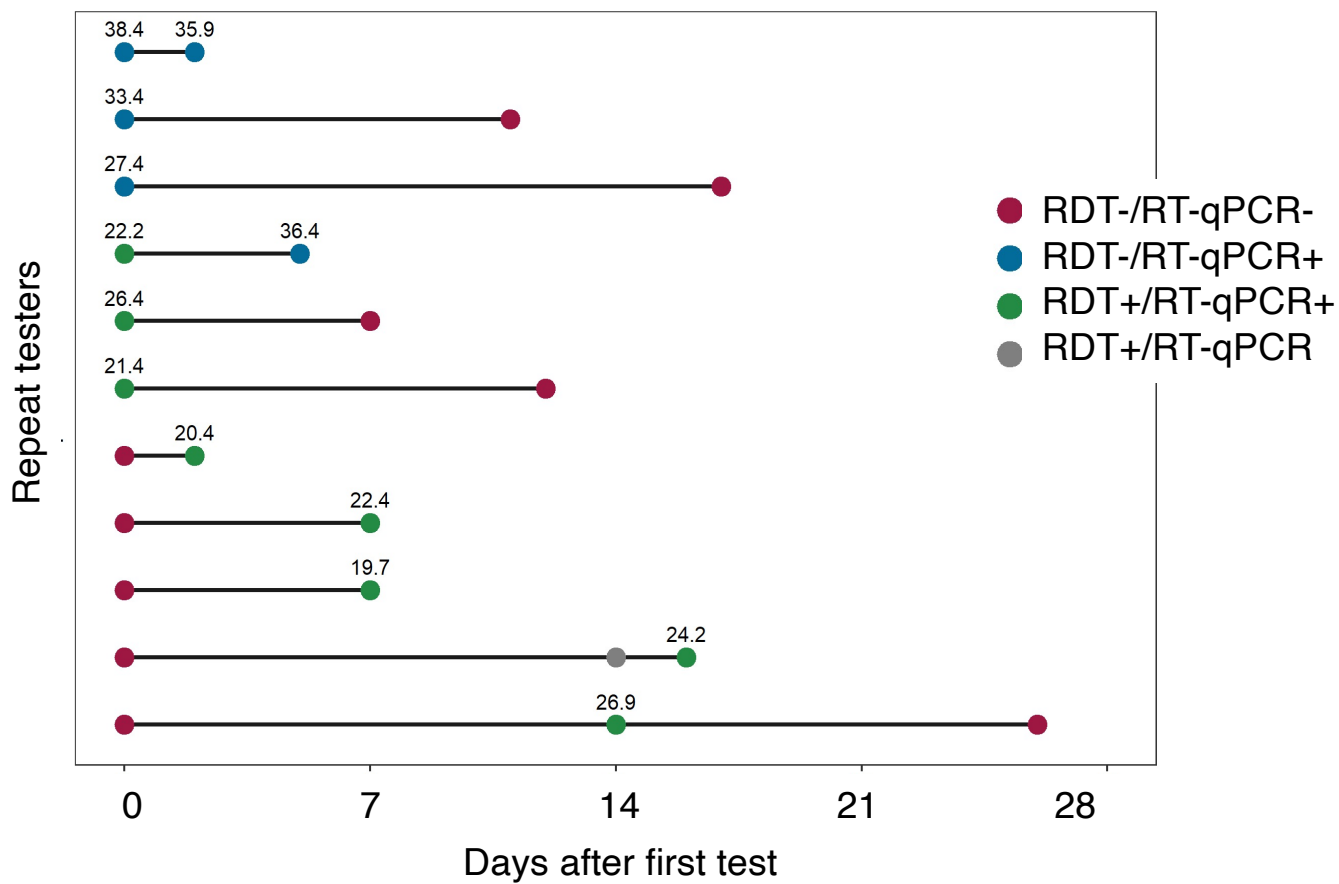

**Supplementary Table 1:** Study participants who enrolled multiple times for testing with both RT-qPCR and Access Bio CareStart

| Total Repeat Testers | 60 | Number of tests after first test |
|----------------------|----|----------------------------------|
| Tested 2 Times       | 50 | 50                               |
| Tested 3 Times       | 6  | 12                               |
| Tested 4 Times       | 3  | 9                                |
| Tested 5 Times       | 1  | 4                                |
| Total repeat tests   |    | 75                               |

**Supplementary Table 2:** Demographics of study participants who are residents of Holyoke, Massachusetts (N=283)

| Demographics                           | Always Negative (N=266) | Ever Positive (N=17) | Overall (N=283) |
|----------------------------------------|-------------------------|----------------------|-----------------|
| <b>Age (Years)</b>                     |                         |                      |                 |
| Mean (SD)                              | 39.3 (18.5%)            | 36.2 (13.3%)         | 39.1 (18.2%)    |
| Median [Min, Max]                      | 37 [4 - 82]             | 31 [23 - 66]         | 36 [4 - 82]     |
| <b>Sex</b>                             |                         |                      |                 |
| Female                                 | 145 (54.5%)             | 6 (35.3%)            | 151 (53.4%)     |
| Male                                   | 108 (40.6%)             | 7 (41.2%)            | 115 (40.6%)     |
| Non-binary                             | 2 (0.8%)                | 0 (0%)               | 2 (0.7%)        |
| Prefer not to answer                   | 11(4.1%)                | 4 (23.5%)            | 15 (5.3%)       |
| <b>Race/Ethnicity category</b>         |                         |                      |                 |
| Hispanic or LatinX                     | 157 (59%)               | 9 (52.9%)            | 166 (58.7%)     |
| Black or African American Non-Hispanic | 5 (1.9%)                | 0 (0%)               | 5 (1.8%)        |
| Two or more races Non-Hispanic         | 3 (1.1%)                | 0 (0%)               | 3 (1.1%)        |
| White Non-Hispanic                     | 95 (35.7%)              | 7 (41.2%)            | 102 (36%)       |
| Prefer not to answer                   | 6 (2.3%)                | 1 (5.9%)             | 7 (2.5%)        |
| <b>Repeat tester</b>                   |                         |                      |                 |
| No                                     | 229 (86.1%)             | 13 (76.5%)           | 242 (85.5%)     |
| Yes                                    | 37 (13.9%)              | 4 (23.5%)            | 41 (14.5%)      |



**Supplementary Table 3:** Symptoms reported at all visits

|                                          |     | Inconclusive<br>(N=4) | Negative<br>(N=631) | Positive<br>(N=31) | Overall<br>(N=666) |
|------------------------------------------|-----|-----------------------|---------------------|--------------------|--------------------|
| <b>Cough</b>                             | No  | 2 (50.0%)             | 600 (95.1%)         | 24 (77.4%)         | 626 (94.0%)        |
|                                          | Yes | 2 (50.0%)             | 31 (4.9%)           | 7 (22.6%)          | 40 (6.0%)          |
| <b>Sore Throat</b>                       | No  | 1 (25.0%)             | 608 (96.4%)         | 28 (90.3%)         | 637 (95.6%)        |
|                                          | Yes | 3 (75.0%)             | 23 (3.6%)           | 3 (9.7%)           | 29 (4.4%)          |
| <b>Chills</b>                            | No  | 3 (75.0%)             | 623 (98.7%)         | 30 (96.8%)         | 656 (98.5%)        |
|                                          | Yes | 1 (25.0%)             | 8 (1.3%)            | 1 (3.2%)           | 10 (1.5%)          |
| <b>Shortness of Breath</b>               | No  | 3 (75.0%)             | 620 (98.3%)         | 31 (100%)          | 654 (98.2%)        |
|                                          | Yes | 1 (25.0%)             | 11 (1.7%)           | 0 (0%)             | 12 (1.8%)          |
| <b>Fever</b>                             | No  | 3 (75.0%)             | 623 (98.7%)         | 28 (90.3%)         | 654 (98.2%)        |
|                                          | Yes | 1 (25.0%)             | 8 (1.3%)            | 3 (9.7%)           | 12 (1.8%)          |
| <b>Muscle Aches or Soreness</b>          | No  | 2 (50.0%)             | 611 (96.8%)         | 23 (74.2%)         | 636 (95.5%)        |
|                                          | Yes | 2 (50.0%)             | 20 (3.2%)           | 8 (25.8%)          | 30 (4.5%)          |
| <b>Nausea, Vomiting or Diarrhea</b>      | No  | 2 (50.0%)             | 612 (97.0%)         | 30 (96.8%)         | 644 (96.7%)        |
|                                          | Yes | 2 (50.0%)             | 19 (3.0%)           | 1 (3.2%)           | 22 (3.3%)          |
| <b>Decreased Sense of Smell or Taste</b> | No  | 3 (75.0%)             | 617 (97.8%)         | 27 (87.1%)         | 647 (97.1%)        |
|                                          | Yes | 1 (25.0%)             | 14 (2.2%)           | 4 (12.9%)          | 19 (2.9%)          |
| <b>Loss of Appetite</b>                  | No  | 4 (100%)              | 623 (98.7%)         | 29 (93.5%)         | 656 (98.5%)        |
|                                          | Yes | 0 (0%)                | 8 (1.3%)            | 2 (6.5%)           | 10 (1.5%)          |
| <b>General Weakness or Fatigue</b>       | No  | 3 (75.0%)             | 604 (95.7%)         | 27 (87.1%)         | 634 (95.2%)        |
|                                          | Yes | 1 (25.0%)             | 27 (4.3%)           | 4 (12.9%)          | 32 (4.8%)          |
| <b>Headache</b>                          | No  | 2 (50.0%)             | 587 (93.0%)         | 24 (77.4%)         | 613 (92.0%)        |
|                                          | Yes | 2 (50.0%)             | 44 (7.0%)           | 7 (22.6%)          |                    |

**Supplementary Table 4A:** CareStart test results compared to RT-qPCR in symptomatic individuals only

| CareStart Results | RT-qPCR Results |                 |                    |                |
|-------------------|-----------------|-----------------|--------------------|----------------|
|                   | Negative (N=61) | Positive (N=29) | Undetermined (N=3) | Overall (N=93) |
| Negative          | 59 (96.7%)      | 15 (51.7%)      | 3 (100%)           | 77 (82.8%)     |
| Positive          | 2 (3.3%)        | 1 (3.4%)        | 0 (0%)             | 3 (3.2%)       |
| Undetermined      | 0 (0%)          | 13 (44.8%)      | 0 (0%)             | 13 (14%)       |

**Supplementary Table 4B:** CareStart test result sensitivity and specificity in symptomatic individuals only

| Type        | RT-qPCR Results |    |          |               |
|-------------|-----------------|----|----------|---------------|
|             | n               | N  | Estimate | 95% CI        |
| Sensitivity | 13              | 28 | 46.4%    | 27.5% - 66.1% |
| Specificity | 59              | 59 | 100%     | 95% - 100%    |

**Supplementary Table 4C:** CareStart test results compared to RT-qPCR in asymptomatic individuals only

| CareStart Results | RT-qPCR Results  |                 |                     |                 |
|-------------------|------------------|-----------------|---------------------|-----------------|
|                   | Negative (N=522) | Positive (N=23) | Undetermined (N=28) | Overall (N=573) |
| Negative          | 518 (99.2%)      | 11 (47.8%)      | 25 (89.3%)          | 554 (96.7%)     |
| Positive          | 3 (0.6%)         | 12 (52.2%)      | 3 (10.7%)           | 18 (3.1%)       |
| Undetermined      | 1 (0.2%)         | 0 (0%)          | 0 (0%)              | 1 (0.2%)        |

**Supplementary Table 4D:** CareStart test result sensitivity and specificity in asymptomatic individuals only

| Type        | RT-qPCR Results |     |          |               |
|-------------|-----------------|-----|----------|---------------|
|             | n               | N   | Estimate | 95% CI        |
| Sensitivity | 12              | 23  | 52.2%    | 30.6% - 73.2% |
| Specificity | 518             | 521 | 99.4%    | 98.3% - 99.9% |

**Supplementary Table 5A:** CareStart test results compared to RT-qPCR using Ct positivity threshold of < 30.

| CareStart Results | Negative (Ct >=30)<br>N=597 | Positive (Ct <30)<br>N=38 | Undetermined<br>N=31 | Overall N=666 |
|-------------------|-----------------------------|---------------------------|----------------------|---------------|
| Negative          | 590 (98.8%)                 | 13 (34.2%)                | 28 (90.3%)           | 631 (94.7%)   |
| Positive          | 4 (0.7%)                    | 24 (63.2%)                | 3 (9.7%)             | 31 (4.7%)     |
| Undetermined      | 3 (0.5%)                    | 1 (2.6%)                  | 0 (0%)               | 4 (0.6%)      |

**Supplementary Table 5B:** CareStart test result sensitivity and specificity using Ct positivity threshold of < 30.

| Type        | n   | N   | Estimate | 95% CI        |
|-------------|-----|-----|----------|---------------|
| Sensitivity | 24  | 37  | 64.9%    | 47.5%-79.8%   |
| Specificity | 590 | 594 | 99.3%    | 98.3% - 99.8% |
